# Supplementary material for: Targeting CDC7 sensitizes resistance melanoma cells to BRAFV600E-specific inhibitor by blocking the CDC7/MCM2-7 pathway
Source: PubMed Central journal article supplement (PMC6775054; doi:10.1038/s41598-019-50732-w), 2019-10-02

**Targeting CDC7 sensitizes resistance melanoma cells to BRAF<sup>V600E</sup>-specific inhibitor by blocking the CDC7/MCM2-7 pathway**

Shaimaa A. Gad<sup>1,4</sup>, Hamdy EA Ali<sup>1</sup>, Rofaida Gaballa<sup>1</sup>, Rania M. Abdelsalam<sup>2</sup>, Mourad Zerfaoui<sup>3</sup>, Hamed I. Ali<sup>1</sup>, Salwa H. Salama<sup>4</sup>, Sanaa A. Kenawy<sup>2</sup>, Emad Kandil<sup>3</sup>, Zakaria Y. Abd Elmageed<sup>1</sup>

<sup>1</sup>Department of Pharmaceutical Sciences, Rangel College of Pharmacy, Texas A&M Health Science Center, Kingsville, TX 78363, <sup>2</sup>Department of Pharmacology and Toxicology, Faculty of Pharmacy, Cairo University, <sup>3</sup>Department of Surgery, Tulane University School of Medicine, New Orleans, LA 70118, <sup>4</sup>Department of Pharmacology, Medical Division, National Research Center, Cairo.

**Supplementary Information**

**Supplementary Table 1.** Clinical information of melanoma patients used in the study

| <b>Parameter</b>   | <b>Description</b> | <b>Mean (%)</b> |
|--------------------|--------------------|-----------------|
| Age (Mean±SD)      |                    | 54.4 ± 14.2     |
| Gender             | Male               | 50 (55%)        |
|                    | Female             | 40 (45%)        |
| Organ              | Skin               | 70 (77.7)       |
|                    | Rectum             | 10 (11.1)       |
|                    | Vulva              | 6 (6.6)         |
|                    | Others             | 4 (4.4)         |
| T-stage            | T1+2               | 10 (11.1)       |
|                    | T3+4               | 70 (77.7)       |
| Pathological stage | I                  | 6 (6.6)         |
|                    | II                 | 62 (68.9)       |
|                    | III+IV             | 12 (13.3)       |

**Supplementary Table 2.** Correlation of CDC7 expression with clinical outcomes of melanoma patients

| Parameter |          | Cyto.  | Nucl.  | Age           | Gender        | TNM     | Stage         |
|-----------|----------|--------|--------|---------------|---------------|---------|---------------|
| Cyto.     | <i>r</i> | 1.0000 | 0.0048 | 0.3195        | 0.2547        | 0.1463  | 0.2810        |
|           | <i>p</i> |        | 0.9656 | <b>0.0034</b> | <b>0.0209</b> | 0.2200  | <b>0.0167</b> |
| Nucl.     | <i>r</i> |        | 1.0000 | -0.0623       | -0.0764       | 0.1869  | 0.1016        |
|           | <i>p</i> |        |        | 0.5777        | 0.4948        | 0.1157  | <b>0.0167</b> |
| Age       | <i>r</i> |        |        | 1.0000        | -0.0103       | 0.1498  | 0.0735        |
|           | <i>p</i> |        |        |               | 0.9229        | 0.1845  | 0.5224        |
| Gender    | <i>r</i> |        |        |               | 1.0000        | -0.1744 | 0.2059        |
|           | <i>p</i> |        |        |               |               | 0.1216  | 0.0704        |
| TNM       | <i>r</i> |        |        |               |               | 1.0000  | 0.6348        |
|           | <i>p</i> |        |        |               |               |         | 0.0004        |
| Stage     | <i>r</i> |        |        |               |               |         | 1.0000        |
|           | <i>p</i> |        |        |               |               |         |               |

Correlation coefficient (*r*) was calculated among different groups and significant data considered at  $p < 0.05$  (bold numbers).

**Supplementary Figure 1. Representative photomicrograph showing the effect of Vemurafenib treatment on parental (P) and Vemurafenib resistant (R) melanoma cells.** Total cell lysate collected at different time points (from 1-24h) of 2.5  $\mu$ M Vemurafenib treatment. Western blot analysis was performed and membranes were probed with the designated antibodies as shown. B-actin was used as a loading control. Protein signals were detected by Odyssey CLX Imaging System. M: protein marker

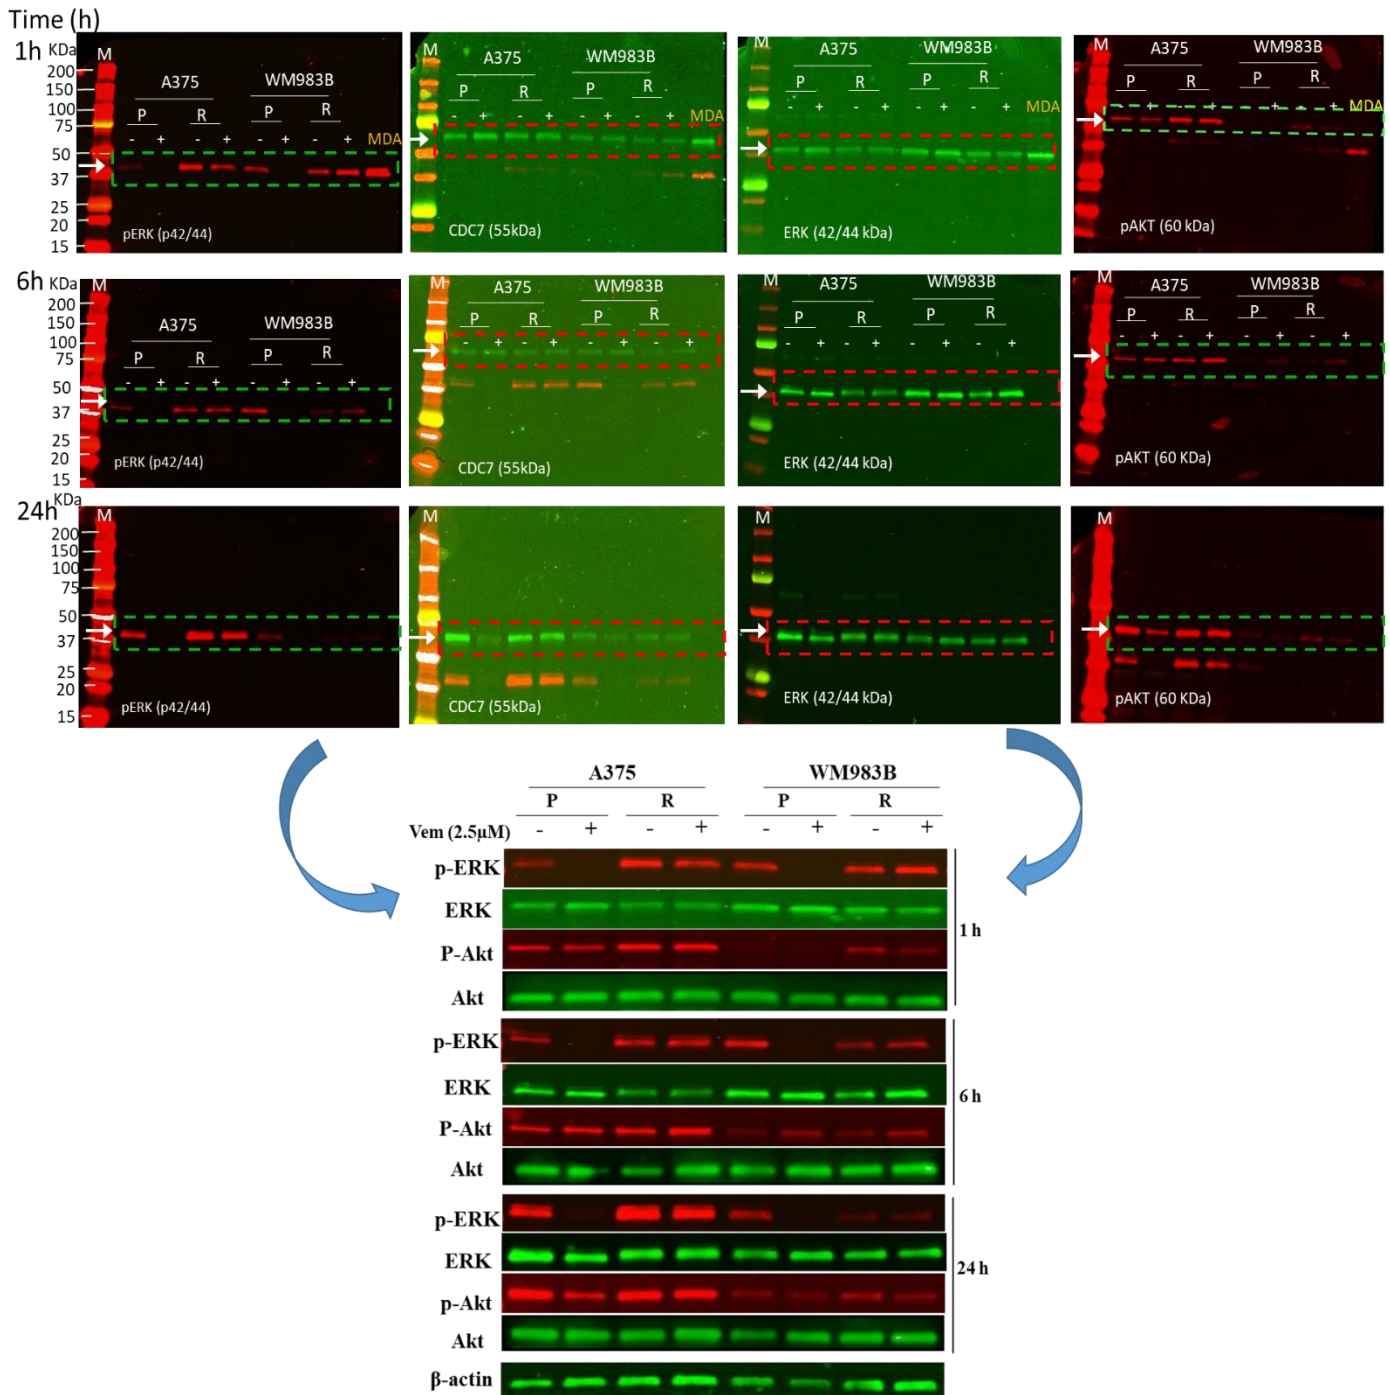

**Supplementary Figure 2. Representative photomicrograph of endogenous expression of CDC7 in sensitive (P) and resistant (R) cells before and after treatment with Vemurafenib.** Total cell lysate collected before (A) or after (B) treatment of melanoma cells with 2.5 $\mu$  Vemurafenib at different time points (24 & 48h). Western blot analysis was performed and membranes were probed with the designated antibodies. GAPDH or  $\beta$ -actin was used as loading control.

M: protein marker

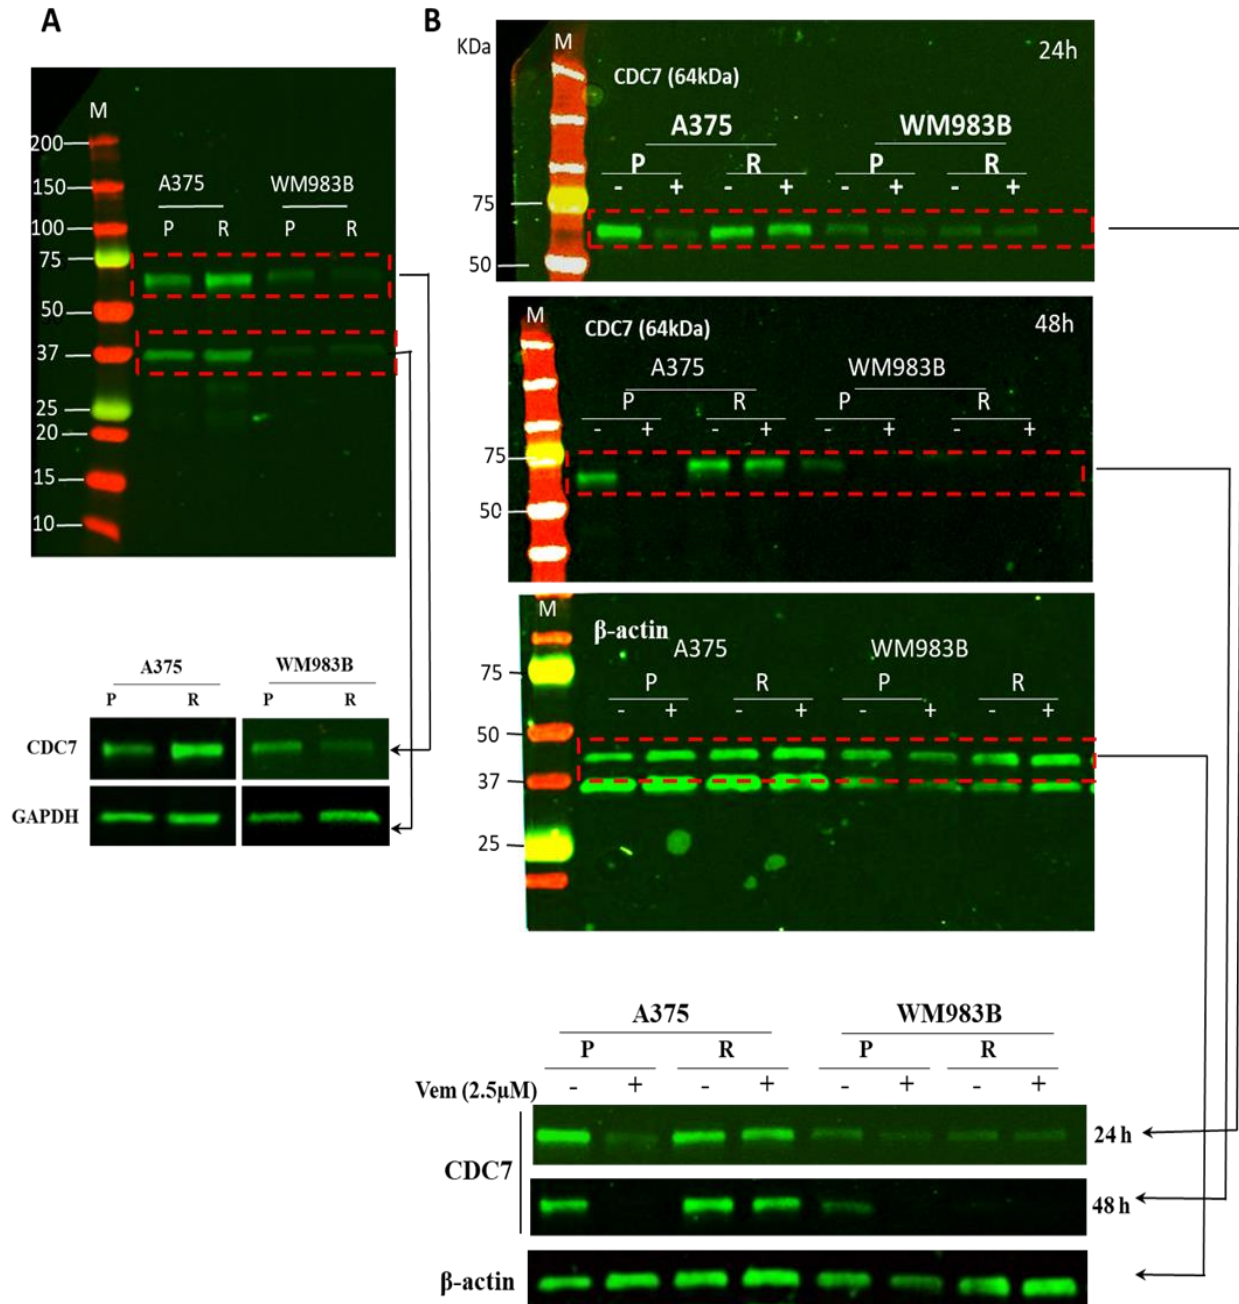

**Supplementary Figure 3. Representative photomicrograph showing targeting of CDC7 and phosphorylated ERK1/2 by miR-3613 mimic.** Total cell lysate collected after transfection of A375 cells with 25 & 50nM miR-3613-3p mimic in addition control cells transfected with non-specific siRNA (scrambled). Western blot analysis was performed and membranes were probed with the designated antibodies. GAPDH was used as a loading control.

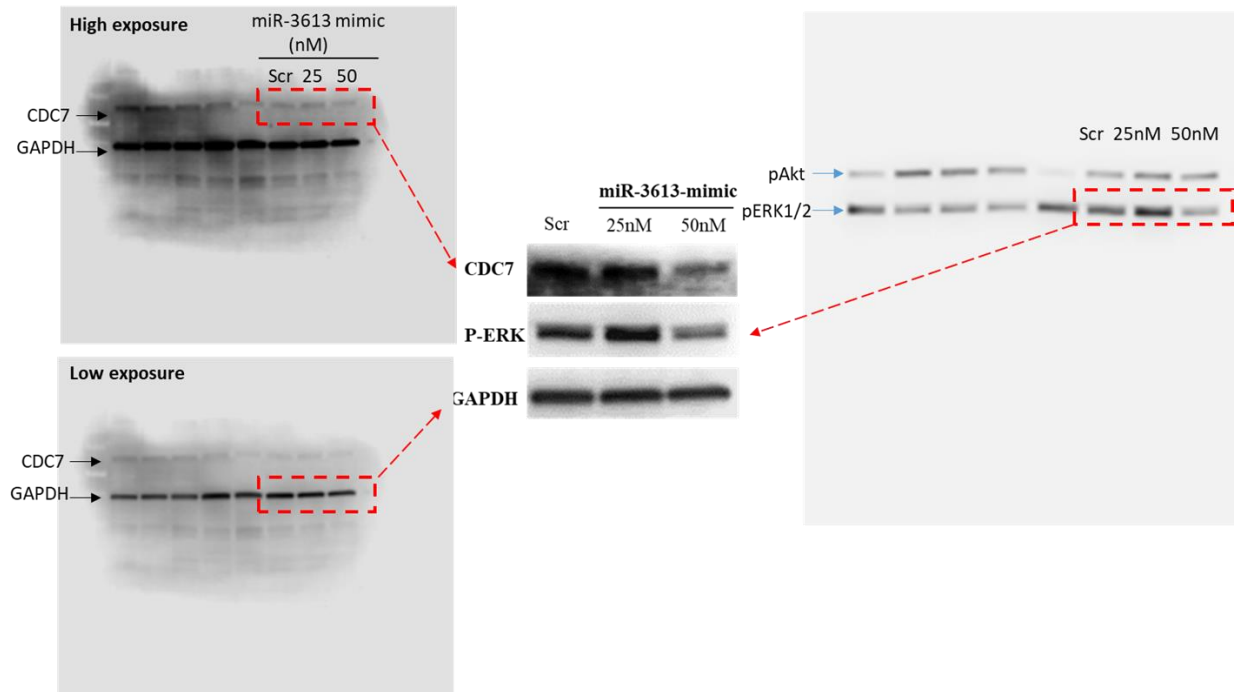

**Supplementary Figure 4. Representative photomicrograph after treatment of A375-R cells with Vemurafenib or CDC7 inhibitor TAK-931.** Total cell lysate collected after treatment of A375-R cells with either 2.5 $\mu$  Vemurafenib or 500nM or 1000nM TAK-931 at different time points. Western blot analysis was performed and membranes were probed with the designated antibodies.

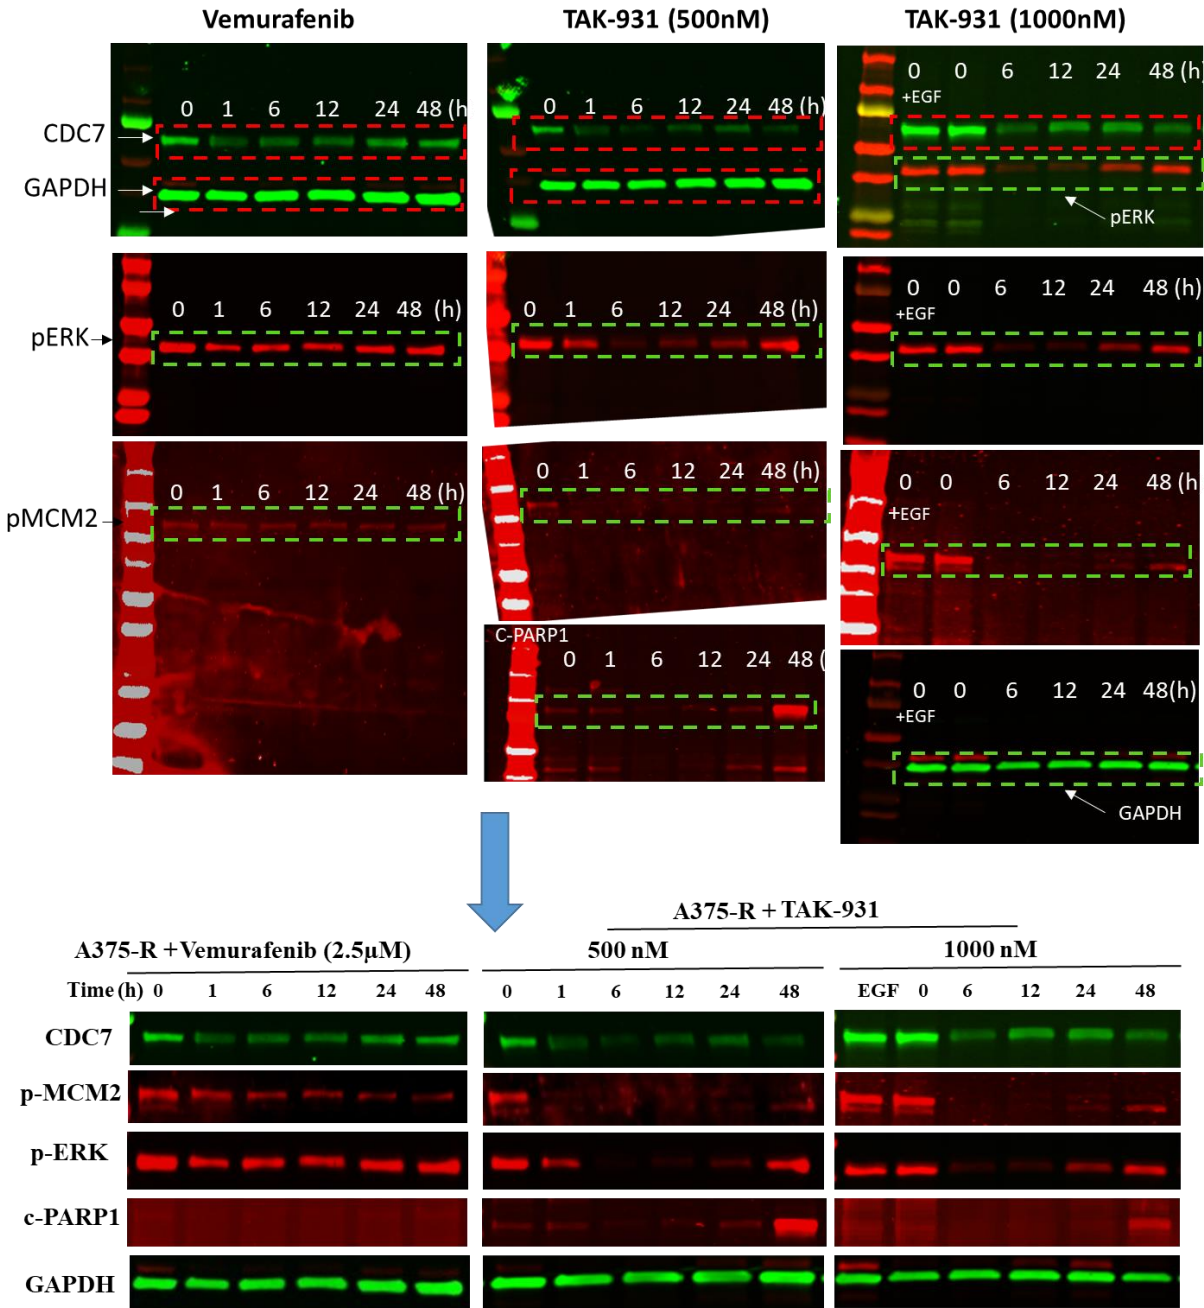

Supplement: 41598_2019_50732_MOESM1_ESM.pdf [file 41598_2019_50732_MOESM1_ESM.pdf]
